# Supplementary material for: Aminoacyl-tRNA synthetase evolution and sectoring of the genetic code
Source: PubMed Central journal article supplement — Transcription. 2018 May 30;9(4):205–24. doi: 10.1080/21541264.2018.1467718 (PMC6104698; doi:10.1080/21541264.2018.1467718), 2018-05-30
Supplement: ktrn-09-04-1467718-s001.pdf [file ktrn-09-04-1467718-s001.pdf]

# Supplementary Material

## Aminoacyl-tRNA synthetase evolution and sectoring of the genetic code

Daewoo Pak<sup>1</sup>, Yunsoo Kim<sup>2</sup> and Zachary F Burton<sup>\*3</sup>

\*Corresponding author: Department of Biochemistry and Molecular Biology, Michigan State University, E. Lansing, MI 48824-1319, Phone: 517-353-0859, Fax: 517-353-9334, [burton@msu.edu](mailto:burton@msu.edu)

1. Center for Statistical Training and Consulting, Michigan State University, E. Lansing, MI 48824, USA
2. Troy High School, Troy, MI
3. Department of Biochemistry and Molecular Biology, Michigan State University, 603 Wilson Rd, E. Lansing, MI 48824-1319; [burton@msu.edu](mailto:burton@msu.edu); 517-353-0859

Supplementary File 1. The *Pyrococcus furiosus* Pfu GlyRS-IIA homology model (PDB file).

Supplementary File 2. Supplementary Figure S1. A sequence alignment of archaeal GlyRS-IIA, IleRS-IA and ValRS-IA enzymes.

Supplementary Figure S1. Alignment of GlyRS-IIA, IleRS-IA and ValRS-IA enzymes. Red shading indicates identity comparing class I and class II aaRS. Yellow shading indicates similarity comparing class I and class II aaRS. Zn-binding motifs are highlighted using green shading. Three  $\beta$ -sheets (sss) that flank the shared Zn-binding domain in class II aaRS are shaded magenta. Shared Zn-finger  $\beta$ -sheets are shaded gray. Active site  $\beta$ -sheets are highlighted in cyan. Numbers indicate e-values for the best local alignments to *Pyrobaculum aerophilum* GlyRS-IIA. HIGH and KMSKS motifs are conserved for class I aaRS enzymes (annotations below the alignment). Motifs 1-3 are conserved for class II aaRS enzymes (annotations above the alignment). Helix is designated hhhh. Not all secondary structures are shown. Pfu) *Pyrococcus furiosus*; Sma) *Staphylothermus marinus*; Sso) *Sulfolobus solfataricus*; Pae) *Pyrobaculum aerophilum*.

|              |   |                                                                                 |       | e-value              |
|--------------|---|---------------------------------------------------------------------------------|-------|----------------------|
| WP_011012774 | - | -----                                                                           | ----- | Pfu GlyRS-IIA 4e-146 |
| WP_011839420 | - | -----                                                                           | ----- | Sma GlyRS-IIA 5e-146 |
| WP_009988726 | - | -----                                                                           | ----- | Sso GlyRS-IIA 6e-136 |
| WP_011838370 | 1 | M[5] LKQYDPHKVEEW VKRFWDENQIYkLVKEKSDRSILRFNFIDGPPYPSGdVPHIGTAWNKTlkDIVLRYKMR   | 79    | Sma IleRS-IA 0.002   |
| WP_011011404 | 1 | M LPKNYDPNEIEP-[4] ---YWLEEKIY-KYKLEPDKPS--YAIDTPPPFTSG-TLHLGHVLSHTWIDIARYKMR   | 70    | Pfu ValRS-IA 0.86    |
| WP_011839031 | 1 | M SEQRFKPLIEEKR[8] LYKKWEEMGLF-KFTFREDDPREIIAIDTPPPYASG-KWHVGGAAHYAQIDMIARYFRMK | 80    | Sma ValRS-IA 2.0     |
| Q8ZWU4       | 1 | M[6] LPPSYRPHEVKKA VEEFWRNRRIFeKWK--SWRGGPKFTFLEGPPTNG-MPHVGHIRGRTYKDVVIRFYRL   | 77    | Pae IleRS-IA 6.3     |
| WP_081225707 | 1 | -[3] LTGNYDPKRIEEE IISYWEENKIYnKLKDIVSKRREKFLFIDGPPYPSpTPHIGTIWNKVIKDCILRYQRL   | 76    | Sso IleRS-IA 6.4     |
|              |   | ssssssss HIGH                                                                   |       |                      |

|              |       |                                                                                   |     |
|--------------|-------|-----------------------------------------------------------------------------------|-----|
| WP_011012774 | ----- |                                                                                   |     |
| WP_011839420 | ----- |                                                                                   |     |
| WP_009988726 | ----- |                                                                                   |     |
| WP_011838370 | 80    | GYNVFDPRPGYDCHGLPIEVKVEQKLGVKVKREIeEKIGVDKfVNECKKLVFNNIKSLTKW-FKELGVFMDWENPYLTLRD | 158 |
| WP_011011404 | 71    | GYNVLFPPQGFNDHGLPTELKVEKEFGISKDQ-----PEEFLKCKIEWTWQAIEKMRAQ-FIRIGYSADWDLEYHTMDD   | 142 |
| WP_011839031 | 81    | GYNVLVPFYADRNLGPEVQVEKTYGINPHEISkTPEGREEFLRLCRKFLDKAEEDIVKI-WRMLGCSFDY-WRNGTDSE   | 158 |
| Q8ZWU4       | 78    | GYDVVWQGGWDMQMPVEWEVEKLLKLRSKKDI-EQFGLEKFALECNLSVEEYLAYWREWgTKRGLGLWLDLENAYETROP  | 156 |
| WP_081225707 | 77    | GKRVDQPGYDTHGLPIEVATEKLLGI SNKQEIiDKIGVETfINKCKEFALSADKMTQN-FKNVGVFMDWERPYTLDP    | 155 |
|              |       | ssssss ss                                                                         |     |

|              |       |                                                                                 |     |
|--------------|-------|---------------------------------------------------------------------------------|-----|
| WP_011012774 | ----- |                                                                                 |     |
| WP_011839420 | ----- |                                                                                 |     |
| WP_009988726 | ----- |                                                                                 |     |
| WP_011838370 | 159   | EYIEAGWWLIKAAEQGLLDREERVVYWCPRCSTTLAEYEV--EYKVLTDPSIYVKFPVRSReKEYLLIWTTPWTLPAN  | 236 |
| WP_011011404 | 143   | WYKAAVQKSLLDfYKGLIYREEHPVYWCPRCRTSLAKAEV--GYVEEEGYLYYIKLPLADG-SGYIPIATTRPELMPAC | 219 |
| WP_011839031 | 159   | EYRKITQATFIELYKGLIYEAERPvNWCPRCKTTLADAEL--EHKEAEGYLYYIKFKVKET-GEEVIVATTRPEMLRAC | 235 |
| Q8ZWU4       | 157   | HYLQYAWRIVKRAHELGLLTEDYRVLWfCPRCETSLSDHEValGYDEREDPSIYVKFRVEGGvDEYLVIWTTPWTIVDN | 236 |
| WP_081225707 | 156   | SYISSWSVIKKAYEKGMldKGTAVLHWfCPRCETTLSDYEVs-EYRDLEDPSIYVKFKIKGEKNRYLLIWTTPWTIPSN | 234 |
|              |       | CXXC                                                                            |     |

|              |       |                                                                                    |     |
|--------------|-------|------------------------------------------------------------------------------------|-----|
| WP_011012774 | ----- |                                                                                    |     |
| WP_011839420 | ----- |                                                                                    |     |
| WP_009988726 | ----- |                                                                                    |     |
| WP_011838370 | 237   | TFVMAHPD[36] EFPgKKLEGLYDHPLIDIVP[10] VVMAPEFVTTEGTGLVHGAPGHMEDFTVAKKIGIDFIASpI    | 354 |
| WP_011011404 | 220   | VAVFVHPD DERYKHLVgKKVKLPIYEREV PILADEVDPNFGTGAVYNCTYgDEQDIVWQKRYNLPVIA-I           | 290 |
| WP_011839031 | 236   | KALVFHPE DDRYKHLNGLHAINPLYGHEM IITTYPEVDPEFGTGLVMVCSYgDQTDVKMFRDLGLKPTII-I         | 306 |
| Q8ZWU4       | 237   | EAVAVHPD[40] TKKGVELAGVRYIHPLAAEVP[ 8] VVTA-EFVTLEQGTGLVHIAPGHGPEDFELAKKYGLPVTNS-V | 354 |
| WP_081225707 | 235   | VFVMINKD[36] TYKGSeligIKYEHPLREFVS[10] VVDAGNIvTLTDGTGLVHSATGHGEEDFTVgQKYGFVVMF-V  | 351 |

Motif 1

|              |     |                                                                                   |     |
|--------------|-----|-----------------------------------------------------------------------------------|-----|
| WP_011012774 | 1   | -----M--KFDKYEYIQDLMRRRGFAWGSFEIYGGARGFYDYGPLGATIKRKIEK-K-IREFIREG-F-FE           | 61  |
| WP_011839420 | 1   | -----MVNKQVDKYQILLLDLGKRRGIFWLSYEIYGGVAGFYDFGPNVLIKRNININWLNLLVYNIG-LVLE          | 66  |
| WP_009988726 | 1   | -----MSEVIDK---VLDLAKRRGIFWLSYEIYGGVAGFYDIPVGVRIKKNRIVELMRKYFVKDNGDFVVE           | 63  |
| WP_011838370 | 355 | DDEGRFTNVAGKYAGKKVREANPEIIKDLKERGALLHASQITHKYPVQWR---CKTPTVMRATKQWVLRVTKLKEKLINE  | 431 |
| WP_011011404 | 291 | NEDGTMENAGPYAGLKIIEEARKKIAEDLEKMGILYKKEKITHRVLRHTERSSSMPTIELLPKQWFIKPREFTDIVEEV   | 370 |
| WP_011839031 | 307 | DKDGLRQLVAGPLSGLKVEEARAKAEILEEKGLLVKKEKITKHSVPVQWR---CKTPTQIHTKEWFLKQLDFKDEIRKI   | 383 |
| Q8ZWU4       | 355 | EINGIYNELGGRYKGVHYDVKETRDLRSGIIVFEEKIRHEYPHCWR---CGSKLILRADRQWFIAISRIIRDKMYAE     | 431 |
| WP_081225707 | 352 | NDRGEFTEEGKYKGLKVRDASKAII SDLKSKNTLFFEKGLVHRYVQWR---CKTPLILRATDQWFIIRVTIKIKDKMLNE | 428 |

Motif1

|              |     |                                                                                   |     |               |        |
|--------------|-----|-----------------------------------------------------------------------------------|-----|---------------|--------|
| WP_011012774 | 62  | IEIPDITPEQVFIASGHVEKQV-----DPLVECKKCGARFRADHIEetLGIDVESKSAEEMT-----KI             | 121 | Pfu GlyRS-IIA | 4e-146 |
| WP_011839420 | 67  | IEIPDITPRIVLKASGHEDHFT-----DPITECTRGRVFRADHIEeaLGIRAEGLSMDLW-----KL               | 126 | Sma GlyRS-IIA | 5e-146 |
| WP_009988726 | 64  | IESPMIGPAKVFEEASGHVESFT-----DPIVECNNGKRIYRADHIEdiLKKSVVGLKPEELT-----RI            | 123 | Sso GlyRS-IIA | 6e-136 |
| WP_011838370 | 432 | AKKVNWIEFDWALDRMMHLENL-QDWWISRQRVWGTPLEIWECEPCHRI-VVGSINE--LEKHG-GKKPKF-----LHRPW | 502 | Sma IleRS-IA  | 0.002  |
| WP_011011404 | 371 | AKKINWYPEDMFLRLKDWAESMdwDWWISRQVFGTPLEFWICKNGHII-----PAREED--LPVDP                | 431 | Pfu ValRS-IA  | 0.86   |
| WP_011839031 | 384 | AKTIEEKPEMHRKLLLDWIDSVSDWPISRDRYATEVFPVWRCRCKGSV-----LLPEPG--kYYRPW               | 444 | Sma ValRS-IA  | 2.0    |
| Q8ZWU4       | 432 | LQKVNWVETKLRDRFDIFVQNA-RDWNISRVRWGTPLEFVWRCRCKDGRIILVIGSIEE--LKKLAKEIPVDDFklVHRPW | 508 | Pae IleRS-IA  | 6.3    |
| WP_081225707 | 429 | IEKVNWIEFDWGKSRISNMVKEL-RDWWISRQRFWGTPLEIWIICRNNVMOVGSKEE--LESIAIDFVEND---LHRPW   | 501 | Sso IleRS-IA  | 6.4    |

Motif2

|              |     |                                                                                   |     |
|--------------|-----|-----------------------------------------------------------------------------------|-----|
| WP_011012774 | 122 | IREHNI--RCPECGGE---LSDV-WYENLMFETYIGPYKDKK-----AYLRPETAQGIIVNEKRLN                | 176 |
| WP_011839420 | 127 | IKENNI--RCPECGGE---LTKP-KPALLLFKTEIGPYKGGSP-----AYLRPETAQGMFVVFKEHVL              | 181 |
| WP_009988726 | 124 | IKENNI--RCQYCGGE---LGEV-RLFNLLFTTNGPYTGNI-----GYIRPETAQGMFTAFAKRVY                | 178 |
| WP_011838370 | 503 | IDEVEI--KCPICGRP---MGRVDPVMDVWEDSAISFVAAN--GHPEKLRLE-EDV-ILDVILEGHDIQIRGWFFSLLRAG | 572 |
| WP_011011404 | 432 | FDKPPVekKCPVCCAE---IEPVTDVLDCAVWSSITELIITK [6] GDEEAKKwfEHNFPALRPQGTDIRTWAFYTFIRT | 511 |
| WP_011839031 | 445 | KDEPPVdKCPVCCAPkeyLEGEKVFDTWFDSSISVLYVT--GYKRNDKlFRAFKYTLRPQGDIIIRTWLYYSLLRV      | 520 |
| Q8ZWU4       | 509 | IDQVKI--SAHDCDEW---V-REPYVMDVWLDSGLAWIAAVD GENNRDLW-EKLFYDFVTEGIDQTRGWYFSLATS     | 579 |
| WP_081225707 | 502 | IDNVRV--KCNKCGV---AKRI PDVADVWFDSSVAFASL- GKDWQEKW-KELGPVDLVLEGHDIQIRGWFFSLLRSG   | 572 |

Motif2

|              |     |                                                                                   |     |
|--------------|-----|-----------------------------------------------------------------------------------|-----|
| WP_011012774 | 177 | AFARNKLPFGVF-----QIGKAYRNEISE----RQGMIRLREFTQAEVE-----                            | 216 |
| WP_011839420 | 182 | NIARNKLPFGIA-----QIGRVGRNEISE----RQGLLRDLREFTIMELE-----                           | 221 |
| WP_009988726 | 179 | EATROLRFIGIA-----QIGKLVGRNEISE----RQGLIRMLREFTIMEIE-----                          | 218 |
| WP_011838370 | 573 | VLGFSKSYNTVLVHGFALDEHGRERHMKSLGNYVGTDEAIEAGRDLRFVWSQNTV-WEDLRFVSRGIDEIRRDLGIAW    | 651 |
| WP_011011404 | 512 | YMLTGEKEWINDIVINGMVAGPDGRKMSKSYGNVVSFEVPIPKYGADALRLWTALAPP-GEDHPFKWEIVDYNFRFLQKLW | 590 |
| WP_011839031 | 521 | YQLTGPAPFKWVRTGMGLDEKGEAMKSKGNVDFEPIYIEKYGADAFRYWAAASAK1GYDYRFBQVIRTGFLFATKWLW    | 600 |
| Q8ZWU4       | 580 | VLYTGRAPYKNVLIQGLILDKHGQRMKSKGNVWAKDLFEKYGADPVRLYLILSKVApWEDLSFDPDEVKYVIGDLNILW   | 659 |
| WP_081225707 | 573 | LILLDRAPYTSVLVHGFMLDEQGREHMKSLGNYVEFSVVEKYSRDILRLWLLRNNTT-WEDAKFSWKALELTKRDLQIIW  | 651 |

KMSKS

```

-----
----- sss
WP_011012774 217 ----- IFFNPNE--TEHPHE--DEVKDEVLRLY--PIEQKLDIGMI 252
WP_011839420 222 ----- FFFDPEKAFEEETMKYMTDEIRNEKLNII--TAEDKLRGEEKT 261
WP_009988726 219 ----- FFDPEE--NNIENIPLYRFKDTKLNII--TASEKEKD-GKP 255
WP_011838370 652 NTFVFASTYMNldkYDPLQHRIDDYKEF [ 4] DKWLLSRINSIAKKTITSLSEKYYIHEAARELRKFTVEDVSHWYIRLIRP 732
WP_011011404 591 NIYRFAERHIKD--FDYEKYKHIELEPL DRWILSR LHRIKFAFTELEKYRFLNLTRELMTFWHEVADDYIEMIKH 665
WP_011839031 601 NIARF----ISM--FQKPEKKPM-LRPL DEATAYENMMLKSIDFAYSNLDVFPITSYIQFHWNYFASHYIEIVKS 670
Q8ZWU4 660 NVVKFADTYMSLdgFDAEKYPLSQWLEK [ 4] DKWILSELNIMISLFTNFVKNEEFHKAALWREFVVEILSHRYIRLIR 740
WP_081225707 652 NTFVFASTYMNldnFEPDKYTLDDI IKY [ 4] DLWILSRFNSMLKKNVNSMKDYKVHEMTNYLINFIEDVSRFYIRLIRK 732

```

```

----- sssss ----- sssssss
WP_011012774 253 EL-TAEHA-----VFKGYVMNTFFAYYVMVIKRIILLDIGIPEDKIRFRQOLPE-----ERAHYSADTWDA 311
WP_011839420 262 RKYTAIRL-----ENKIVKNPWMAYWMALGNIFLRKLGISSEKIRFDEKLPE-----EKAHYSQTFDQ 321
WP_009988726 256 QEFKLEES-----VREKIIIIQPWMAYWMAVASSFVKALGINE--FYEEKLPY-----ERAHYSKQTFDQ 313
WP_011838370 733 RVVVEENT---PDKLAAYSVLYYVLEKMLRMMAPFPFPLAEKIYQEVFRKANPElpLSIHLLDWP SIDDEYIDELEKIM 809
WP_011011404 666 RLYGEDL---ESKLRKAKVALYELLYNIMLLLAPFVPHITEELYHHIFKEKIGI--KSVHLLQWPEYREDRIDEAEKIG 739
WP_011839031 671 RAYNRENKysrEEQEAAWYTLHYILNRTLRLALAPMPFVTDALYTRYLG-----KTVHLEKFPPEPEKEWLNKDYQLAL 743
Q8ZWU4 741 RVWSEEPS---PDKYAAAYAVLHDVLKQVLIILGSLIPFITEYLWQAVVRKYEKNapESVHQAQYPAAGS--YDKLIIYAY 815
WP_081225707 733 RAWIEANT---QDKLAMYVILLYILKQVLIILASTIIPFISEKIYKSFVVNAKE----SVSMESSINYDERFIDNLERAF 805

```

Motif3

```

s sssssssss
WP_011012774 312 EIYSRRGHW-VECVGLAYRTDYDLSRHMKMSGADLTVMIHYDKpKIIVKLNVTLNMKV [5] EKV-KEINEKLSMSQEE 391 Pfu GlyRS-IIA 4e-146
WP_011839420 322 EVYTKYGW-IEVAGYSYRTTYDLSRHIKYSKADLTYPFKKYDKpIKKIVKIVPAPKKI [1] EIVGKDIGTVMKKLNEIF 398 Sma GlyRS-IIA 5e-146
WP_009988726 314 --LAVINGIKVEISGHAYRGDYDLSRHMKYSGQDLTIFRKYKpKMIKKKTVIIVNNTKL [3] ELR-KKIMELLNGKSAEE 390 Sso GlyRS-IIA 6e-136
WP_011838370 810 NVIREIYEAAAAARMKAGIKLRQPVK-SLTVYTRERIREVTR-KYSGLLARLVNVRKV EAKQVAEIGKIVKYKVSF 884 Sma IleRS-IA 0.002
WP_011011404 740 ELAREIVSAMRKYKNSHGMPLNAKLKHVAIYATSYEMLKVIE-KD---IAGTMNIERL EIVKGEPPQLEEKVVEIKP 812 Pfu ValRS-IA 0.86
WP_011839031 744 -LVQKINSAIWSYKKKNNIKFKEKLT-KKIYLP IEAEKAL---KE---IVDLHKLVNI EFHSGSPPA----- 802 Sma ValRS-IA 2.0
Q8ZWU4 816 RELFAVFSALAEARNKAGIKLRWPIR-EAYV-----NGAKYAE-RYTELLKYLGNVKEV KVGR----- 871 Pae IleRS-IA 6.3
WP_081225707 806 EVAREINEASLNARAKAGIKLRWPLA-KVYIFIE NEDTLAKVG-RIKDVLISMLNAKDI EISKIEGFKSFSKYKVEF 880 Sso IleRS-IA 6.4

```

```

----- sssssssss
WP_011012774 392 LRKLVEEINAN GKVIIEGHELEKEDI I I KEVEEKIQGEKIV-----PHVLEPSFGIDRPFYLLLENSLTVD 459
WP_011839420 399 AEKILEELNKN NYVEISNYKLSRECFIISEKETEIHGEKII-----PHVVEPSFGLERIFVVLLENSISTARD 466
WP_009988726 391 IEQMIR-----NNVMIDDKPLS-EFINIVERREKVVHGEHFI-----PHVVEPSFVERTLFLTILSAYK-EKE 451
WP_011838370 885 IYRVIGPLYRK [6] NYIMENQES IARDIIRKGEHTAYIEGQETKLTKEQVLITPSYV-EGYSVEREWGVSVAIDTRLSKE 966
WP_011011404 813 IYKRI GPRYK [6] KHLQENAEIIGRIKEEGKVEFEVEGQKVLEKEDIEIKKAVFSEGEEVET----- 880
WP_011839031 803 -----NAEKIG-----EEVYIEK----- 815
Q8ZWU4 872 -----RPDYLCVKEGEL-E-----VCVPDKTEPE 894
WP_081225707 881 NRSIIGKEYKS [6] EYIENNRDI IAMDILNKKQHVAKIDNFDIILNASYV I I SEETV-EGFISSKFSKGIVVIKETSSES 962

```

|              |     |        |       |   |   |   |   |   |   |   |   |   |   |   |   |   |   |   |   |   |   |   |      |   |      |   |   |   |   |   |   |   |   |   |   |   |   |   |   |   |   |   |   |   |   |   |   |   |   |   |   |      |     |   |   |   |     |      |   |   |     |      |   |   |     |   |   |   |     |     |   |   |      |   |   |      |
|--------------|-----|--------|-------|---|---|---|---|---|---|---|---|---|---|---|---|---|---|---|---|---|---|---|------|---|------|---|---|---|---|---|---|---|---|---|---|---|---|---|---|---|---|---|---|---|---|---|---|---|---|---|---|------|-----|---|---|---|-----|------|---|---|-----|------|---|---|-----|---|---|---|-----|-----|---|---|------|---|---|------|
| WP_011012774 | 460 | G      | R     | V | Y | L | K | I | K | D | M | A | P | E | V | A | V | L | P | L | M | A | ---- | K | P    | T | T | I | A | E | I | Y | R | N | L | Q | K | E | G | F | I | V | V | L | E | K | D | S | I | G | R | Y    | --- | M | R | Y | D   | E    | I | G | T   | P    | Y | C | 527 |   |   |   |     |     |   |   |      |   |   |      |
| WP_011839420 | 467 | G      | R     | I | V | L | K | L | P | P | R | I | A | F | Y | K | V | A | V | F | P | L | M    | T | G    | N | K | P | E | H | K | K | M | S | I | A | R | Q | V | Y | R | A | L | L | E | N | N | I | L | A | Y | L    | E   | E | G | S | I   | G    | R | Y | --- | A    | R | A | D   | E | I | G | I   | P   | Y | A | 539  |   |   |      |
| WP_009988726 | 452 | G      | R     | V | L | L | S | L | P | R | H | L | A | F | Y | D | I | A | V | F | P | L | L    | E | ---- | R | E | E | L | R | K | S | V | E | I | R | E | S | L | S | E | K | - | Y | E | V | L | Y | D | S | G | S    | I   | G | R | Y | --- | A    | R | A | D   | E    | I | G | I   | P | F | A | 518 |     |   |   |      |   |   |      |
| WP_011838370 | 967 | E [11] | R     | I | Q | V | M | R | K | E | I | N | L | E | L | D | A | K | I | E | T | Y | I    | A | P    | R | K | H | V | E | - | L | L | K | P | Y | T | E | Y | I | K | N | E | T | R | S | E | K | L | T | Y | L    | L   | T | P | E | Q   | L    | E | K | I   | Q    | g | y | r   | K | E | W | E   | I   | Q | E | Q    | Y | I | 1052 |
| WP_011011404 |     | -      | ----- |   |   |   |   |   |   |   |   |   |   |   |   |   |   |   |   |   |   |   |      |   |      |   |   |   |   |   |   |   |   |   |   |   |   |   |   |   |   |   |   |   |   |   |   |   |   |   |   |      |     |   |   |   |     |      |   |   |     |      |   |   |     |   |   |   |     |     |   |   |      |   |   |      |
| WP_011839031 |     | -      | ----- |   |   |   |   |   |   |   |   |   |   |   |   |   |   |   |   |   |   |   |      |   |      |   |   |   |   |   |   |   |   |   |   |   |   |   |   |   |   |   |   |   |   |   |   |   |   |   |   |      |     |   |   |   |     |      |   |   |     |      |   |   |     |   |   |   |     |     |   |   |      |   |   |      |
| Q8ZWU4       | 895 | L [11] | R     | I | Q | V | M | R | K | E | T | G | L | E | I | S | D | E | I | H | V | V | E    | T | N    | S | D | D | I | K | K | A | M | E | Q | Y | R | D | Y | I | A | R | E | T | R | A | V | K | L | I | I | ---- | D   | A | V | S | Q   | ---- | g | K | E   | W    | D | I | S   | E | K | V | K   | 973 |   |   |      |   |   |      |
| WP_081225707 | 963 | E [11] | R     | I | Q | F | M | R | K | Q | L | K | L | N | V | L | D | Y | I | E | I | S | M    | K | V    | P | E | E | R | V | K | - | T | I | Q | K | W | E | E | F | I | K | S | E | T | R | A | S | N | I | I | L    | G   | E | A | K | G   | D    | I | T | M   | ---- | D | W | D   | I | E | G | E   | S   | Y | I | 1042 |   |   |      |

|              |      |       |   |   |   |   |   |      |      |   |   |      |      |     |
|--------------|------|-------|---|---|---|---|---|------|------|---|---|------|------|-----|
| WP_011012774 | 528  | V     | T | V | D | N | Q | L    | P    | E | D | G    | [30] | 568 |
| WP_011839420 | 540  | I     | T | I | D | Y | Q | L    | E    | D | E | [38] | 588  |     |
| WP_009988726 | 519  | I     | T | V | D | P | Q | L    | V    | D | N | [45] | 574  |     |
| WP_011838370 | 1053 | I     | V | I | K | Q | L | 1058 |      |   |   |      |      |     |
| WP_011011404 | 881  | A     | V | R | D | A | T | I    | L    | F | F | 891  |      |     |
| WP_011839031 |      | ----- |   |   |   |   |   |      |      |   |   |      |      |     |
| Q8ZWU4       | 974  | I     | E | R | K | A | Q | A    | 981  |   |   |      |      |     |
| WP_081225707 | 1043 | I     | G | I | K | K | S | T    | 1049 |   |   |      |      |     |
